# Supplementary material for: Beef peptides mitigate skeletal muscle atrophy in C2C12 myotubes through protein degradation, protein synthesis, and the oxidative stress pathway
Source: Royal Society of Chemistry journal article supplement (doi:10.1039/d3fo03911k), 2024-01-01
Supplement: d3fo03911k1.pdf [file d3fo03911k1.pdf]

1 **Supplementary information**

2

3 **Beef peptides mitigate skeletal muscle atrophy in C2C12 myotubes through**  
4 **protein degradation, protein synthesis, and oxidative stress pathway**

5

6 Hyeonjin Hur,<sup>‡a</sup> Hye-Jin Kim,<sup>‡a</sup> Dongheon Lee,<sup>a</sup> and Cheorun Jo<sup>\*a,b,c</sup>

7

8 <sup>a</sup> Department of Agricultural Biotechnology, Center for Food and Bioconvergence, and  
9 Research Institute of Agriculture and Life Science, Seoul National University, Seoul 08826,  
10 Republic of Korea

11 <sup>b</sup> Institute of Green Bio Science and Technology, Seoul National University, Pyeongchang  
12 25354. Republic of Korea

13 <sup>c</sup> Department of Animal Product Technology, Faculty of Animal Husbandary, Universitas  
14 Padjadjaran, West Java 45363, Indonesia

15

16 <sup>‡</sup> These authors contributed equally to this work.

17

18 <sup>\*</sup>Corresponding author: Cheorun Jo, Department of Agricultural Biotechnology, and  
19 Research Institute of Agriculture and Life Science, Seoul National University, Seoul 08826,  
20 Korea, Tel: +82-2-880-4820, Fax: +82-2-873-2271, E-mail: cheorun@snu.ac.kr

21

22 **Table S1.** List of primer sequences used for reverse transcription quantitative polymerase chain  
 23 reaction (RT-qPCR)

| Target gene                     |   | Sequence                  | Length (bp) |
|---------------------------------|---|---------------------------|-------------|
| <i>MuRF1</i>                    | F | GTGTGAGGTGCCTACTTGCTC     | 101         |
|                                 | R | GCTCAGTCTTCTGTCCTTGGA     |             |
| <i>Atrogin-1</i>                | F | ATGCACACTGGTGCAGAGAG      | 168         |
|                                 | R | TGTAAGCACACAGGCAGGTC      |             |
| <i>SOD1</i>                     | F | ATGGGTTCACGTCCATCAGTA     | 132         |
|                                 | R | CATTGCCCGAGGTCTCCAACA     |             |
| <i>GPx1</i>                     | F | CCACCGTGTATGCCTTCTCC      | 105         |
|                                 | R | AGAGAGACGCGACATTCTCA      |             |
| <i>CAT</i>                      | F | CGAGGGTCACGAACTGTGTCA     | 132         |
|                                 | R | GGTCACCCACGATATCACCAGATAC |             |
| <i>MyoD</i>                     | F | CCACTCCGGGACATAGACTTG     | 109         |
|                                 | R | AAAAGCGCAGGTCTGGTGAG      |             |
| <i>Myogenin</i>                 | F | AGAAGCGCAGGCTCAAGAAA      | 94          |
|                                 | R | ATCTCCACTTTAGGCAGCCG      |             |
| <i><math>\beta</math>-actin</i> | F | AGACTTCGAGCAGGAGATGG      | 101         |
|                                 | R | ACCGCTCGTTGCCAATAGT       |             |

24 *MuRF1*, muscle ring finger protein-1; *Atrogin-1*, muscle atrophy F-box protein 1; *MyoD*,  
 25 myogenic differentiation 1; *Myogenin*, myogenic factor 4; *SOD1*, superoxide dismutase 1;  
 26 *GPx1*, glutathione peroxidase 1; *CAT*, catalase

27 **Table S2.** List of primary antibodies used for western blot

| Name of antibody                                  | Manufacturer and catalog No. |
|---------------------------------------------------|------------------------------|
| beta-actin (13E5) Rabbit mAb                      | Cell Signaling: #4970S       |
| FoxO1 (C29H4) Rabbit mAb                          | Cell Signaling: #2880S       |
| mTOR Antibody #2972                               | Cell Signaling: #2972S       |
| Akt (pan) (C67E7) Rabbit mAb                      | Cell Signaling: #4691S       |
| 4E-BP1 (53H11) Rabbit mAb                         | Cell Signaling: #9644T       |
| p70 S6 Kinase (49D7) Rabbit mAb                   | Cell Signaling: #2708T       |
| Phospho-FoxO1 (Ser256) Antibody                   | Cell Signaling: #9461S       |
| Phospho-mTOR (Ser2448) Antibody #2971             | Cell Signaling: #2971S       |
| Phospho-Akt (Ser473) (D9E) XP® Rabbit mAb #4060   | Cell Signaling: #4060S       |
| Phospho-4E-BP1 (Thr37/46) (236B4) Rabbit mAb      | Cell Signaling: #9644T       |
| Phospho-p70 S6 Kinase (Thr389) (108D2) Rabbit mAb | Cell Signaling: #9234T       |

28

29 **Table S3.** The eluent gradient condition for liquid chromatography-mass spectrometry (LC-  
30 MS)

| Time<br>(min) | Eluent A<br>0.1% formic acid<br>in double distilled water (%) | Eluent B<br>0.1% formic acid<br>in acetonitrile (%) |
|---------------|---------------------------------------------------------------|-----------------------------------------------------|
| 0             | 95                                                            | 5                                                   |
| 1             | 95                                                            | 5                                                   |
| 17            | 55                                                            | 45                                                  |
| 24            | 0                                                             | 100                                                 |
| 26            | 0                                                             | 100                                                 |
| 26.5          | 95                                                            | 5                                                   |
| 27            | 5                                                             | 5                                                   |
| 30            | 5                                                             | 5                                                   |

31

32

(A)

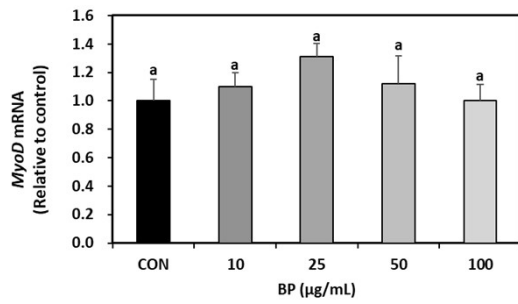

(B)

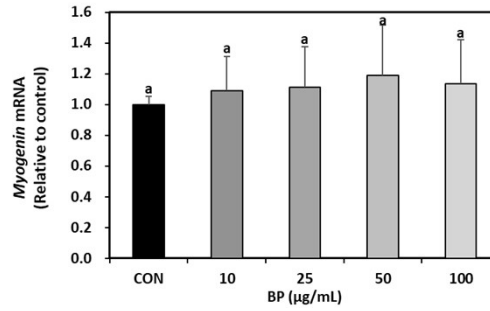

33 **Fig. S1.** Effect of beef peptides (BP) on the myogenic regulatory factors in C2C12 myotubes.  
34 On the sixth day of differentiation, C2C12 myotubes were exposed BP concentrations (10-100  
35 µg/mL) for 24 h. The control (CON) was maintained without any treatment. A-B: Levels of  
36 mRNA for MyoD and Myogenin were measured by reverse transcription quantitative  
37 polymerase chain reaction (RT-qPCR) and normalized to  $\beta$ -actin. <sup>a-b</sup> Different letters indicate  
38 significant differences ( $p < 0.05$ ). Data are expressed as the mean  $\pm$  SD.

39

40

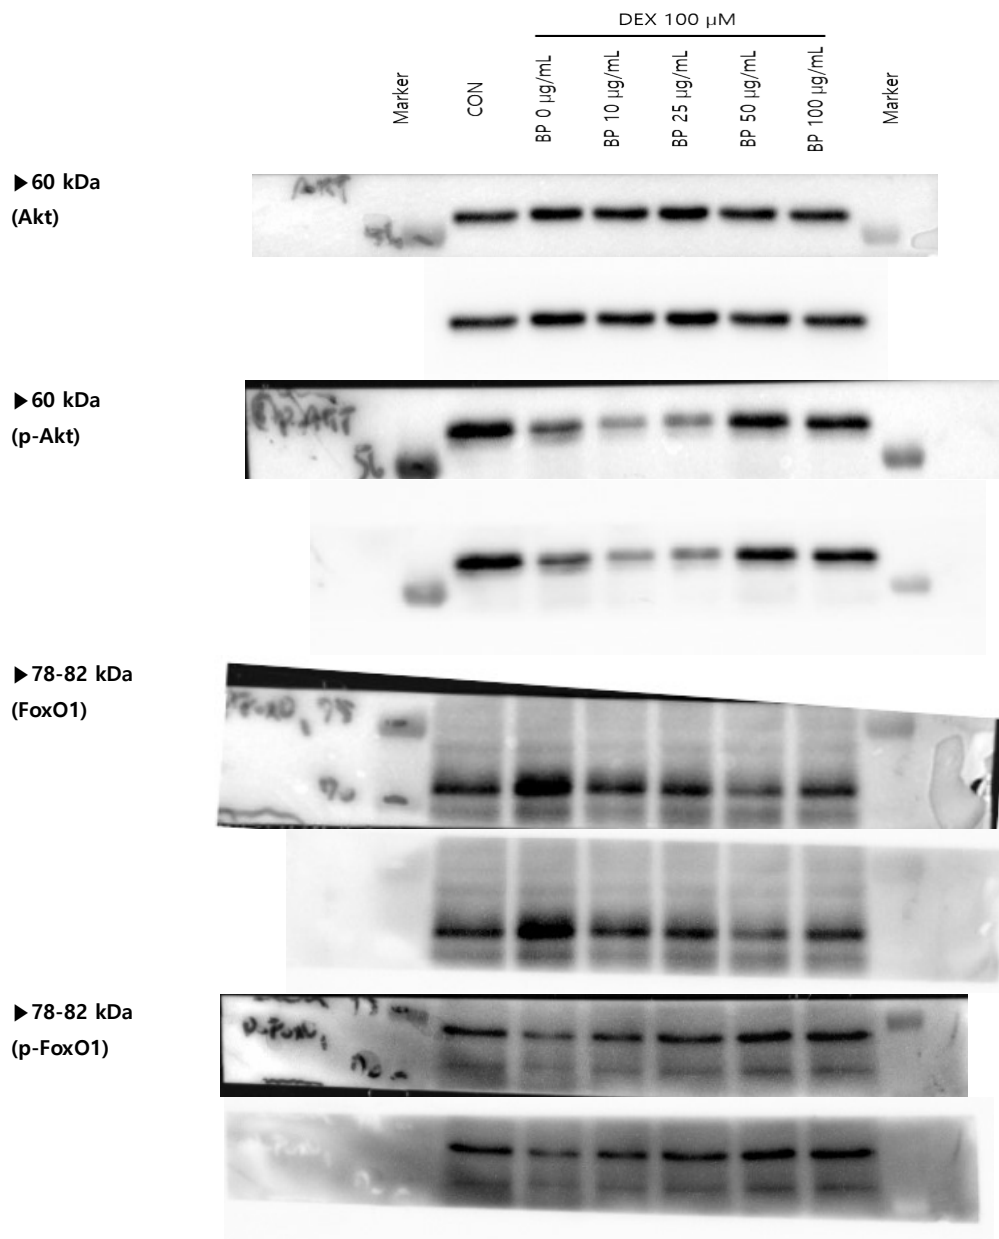

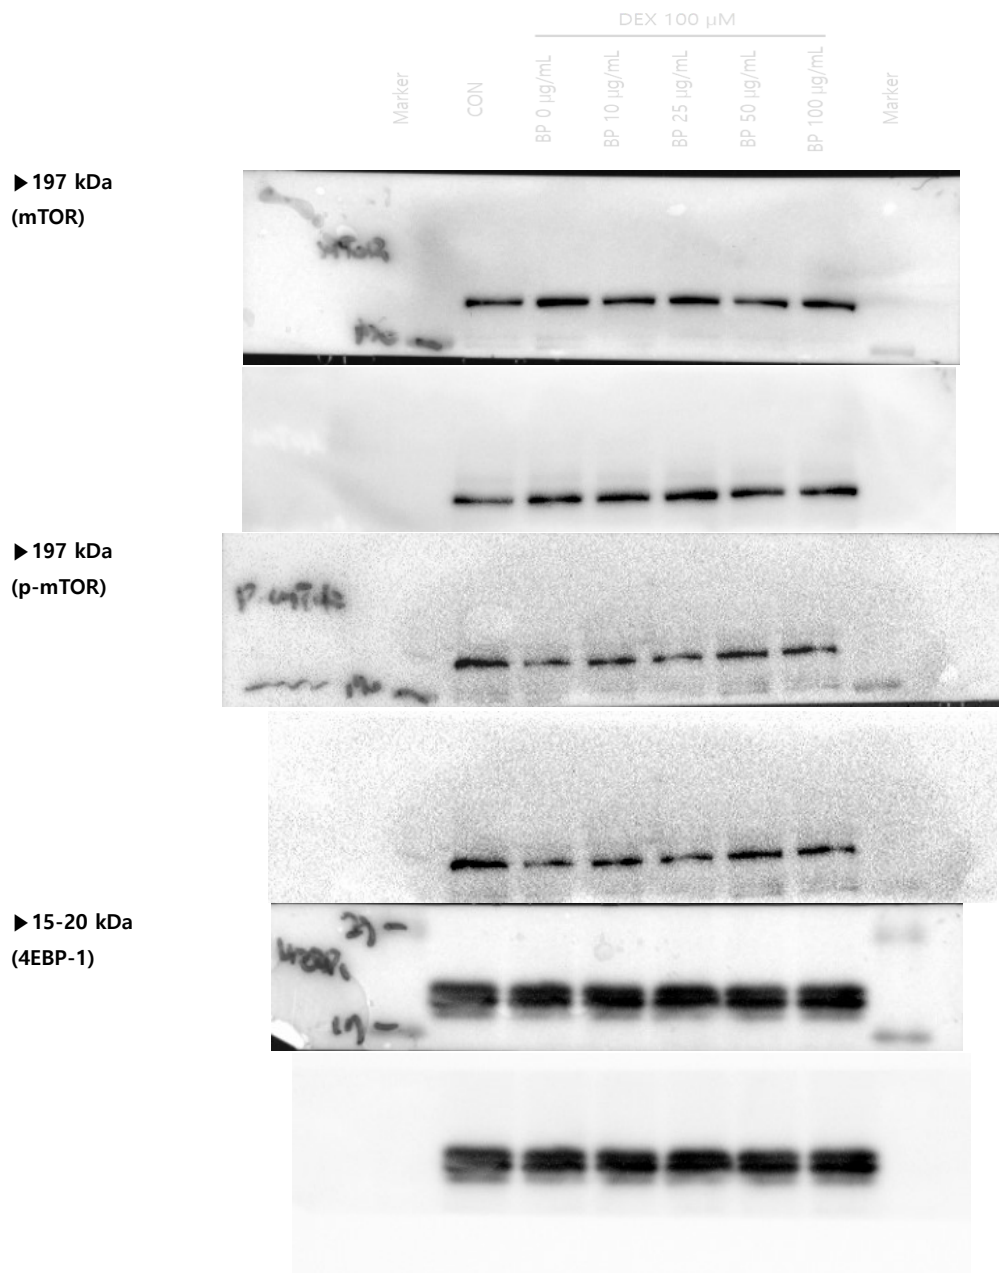

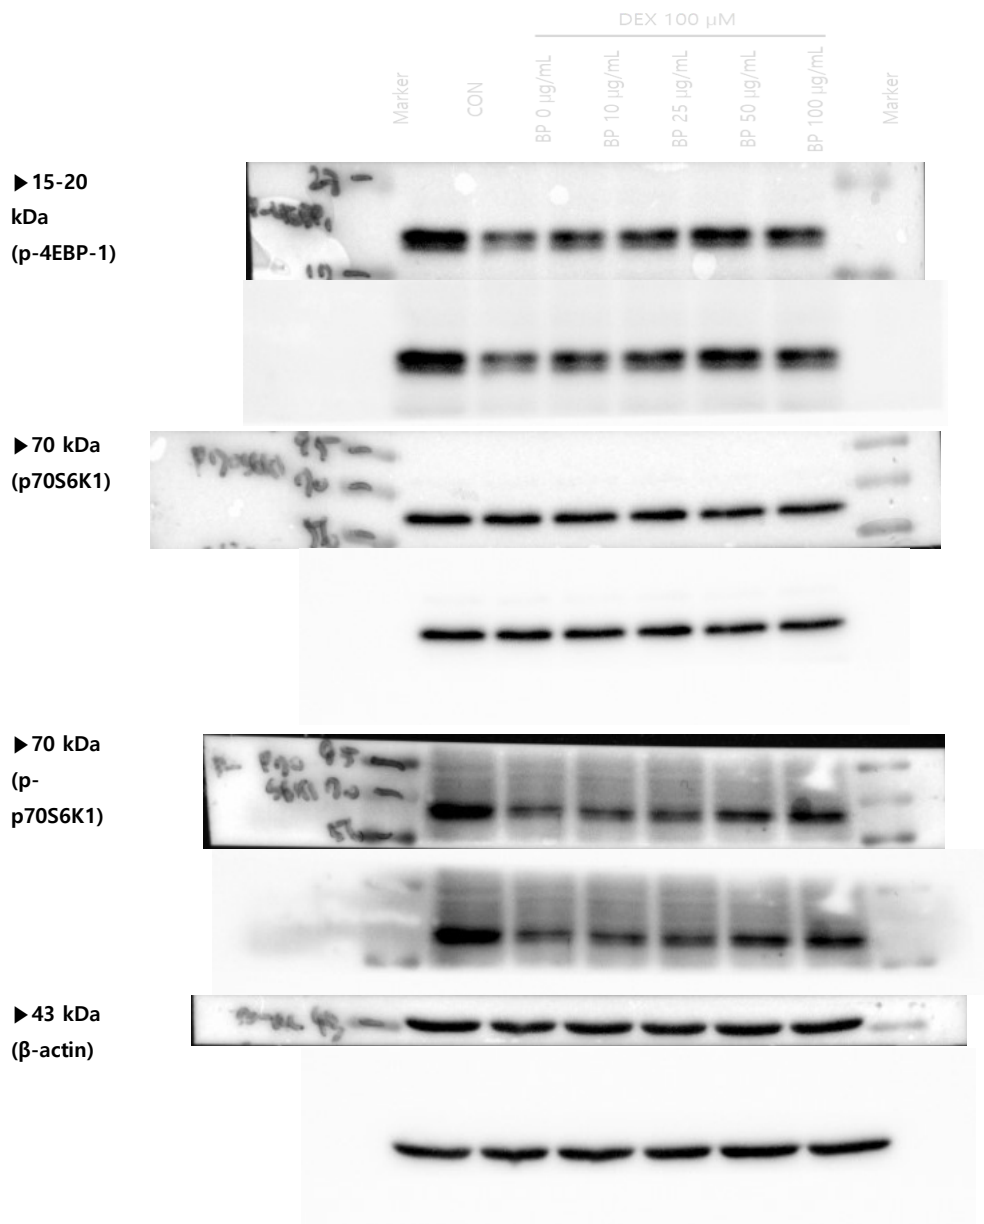

43

44

45 **Fig. S2.** Raw gel images of western blot
